# Supplementary material for: Elevated Troponins after COVID-19 Hospitalization and Long-Term COVID-19 Symptoms: Incidence, Prognosis, and Clinical Outcomes—Results from a Multi-Center International Prospective Registry (HOPE-2)
Source: MDPI journal article supplement (doi:10.3390/jcm13092596), 2024-04-28
Supplement: s1 [file s1]

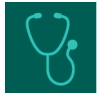

**Supplementary Table S1.** Baseline variables introduced in the univariant model are located in the rows, the selected variables for propensity score matching are outlined in bold and italics; with their *p* value before and after the matching attached.

|                               | Baseline values                       |                                             |                  | After 1:3 propensity score matching   |                                            |                |
|-------------------------------|---------------------------------------|---------------------------------------------|------------------|---------------------------------------|--------------------------------------------|----------------|
|                               | Elevated troponin on discharge (n=78) | Not elevated troponin on discharge (n=2304) | <i>p</i> value   | Elevated troponin on discharge (n=78) | Not elevated troponin on discharge (n=234) | <i>p</i> value |
| <b>Age (years)</b>            | 65.69±15.49                           | 59.14±17.44                                 | <b>0.001</b>     | 65.69±15.49                           | 65.78±14.73                                | 0.966          |
| Gender (male)                 | 46 (58.9%)                            | 1322 (57.4%)                                | 0.779            | 46 (59%)                              | 142 (60.7%)                                | 0.789          |
| <b>Hypertension</b>           | 50 (64.1%)                            | 990 (42.9%)                                 | <b>&lt;0.001</b> | 50 (64.1%)                            | 146 (64.2%)                                | 0.787          |
| Obesity                       | 14 (17.9%)                            | 339 (16.9%)                                 | 0.813            | 14 (17.9%)                            | 46 (19.7%)                                 | 0.740          |
| <b>Diabetes mellitus</b>      | 17 (21.8%)                            | 339 (14.7%)                                 | <b>0.084</b>     | 17 (21.8%)                            | 46 (19.7%)                                 | 0.684          |
| <b>Previous heart disease</b> | 32 (41%)                              | 381 (16.5%)                                 | <b>&lt;0.001</b> | 32 (41%)                              | 98 (41.9%)                                 | 0.895          |

**Supplementary Table S2.** Baseline characteristics of the general population discharged alive from the hospital after propensity score matching. Data has been calculated over the available population with the needed information, unless indicated otherwise with a fraction sign “/” using the available subjects for such parameter. Follow-up time is expressed as days (median) and interquartile range (IQR). Parameters included in the propensity score matching analysis are outlined in *italics*. P-values marked with an asterisk (\*) were corrected using the Fisher’s exact test.

|                           | Population (n=2382)               | Elevated troponin on discharge (n=78) | Not elevated troponin on discharge (n=2304) | <i>p</i> value |
|---------------------------|-----------------------------------|---------------------------------------|---------------------------------------------|----------------|
| <b>Age (years)</b>        | 59.3±17.4                         | 65.69±15.49                           | 59.1±17.4                                   | 0.001          |
| <i>Male</i>               | 1368 (57.4%)                      | 46 (59%)                              | 1322 (57.4%)                                | 0.779          |
| <i>Hypertension</i>       | 1040 (43.7%)                      | 50 (64.1%)                            | 990 (43%)                                   | <0.001         |
| <i>Obesity</i>            | 404 (17%)                         | 14 (17.9%)                            | 390 (16.9%)                                 | 0.813          |
| <i>Diabetes Mellitus</i>  | 356 (14.9%)                       | 17 (21.8%)                            | 339 (14.7%)                                 | 0.084          |
| Dislipidaemia             | 723 (30.4%)                       | 27 (34.6%)                            | 696 (30.2%)                                 | 0.405          |
| Active smoking            | 232 (9.7%)                        | 19 (25.7%)                            | 213 (9.5%)                                  | <0.001         |
| Renal failure             | 95 (4%)                           | 8 (10.3%)                             | 87 (3.8%)                                   | 0.004          |
| Lung disease              | 353 (14.8%)                       | 14 (20.3%)                            | 339 (17.6%)                                 | 0.567          |
| <i>Heart disease</i>      | 413 (17.3%)                       | 32 (41%)                              | 381 (16.5%)                                 | <0.001         |
| Cerebrovascular disease   | 124 (5.2%)                        | 6 (7.7%)                              | 118 (5.1%)                                  | 0.315          |
| Connectivopathy           | 60 (2.5%)                         | 1 (1.3%)                              | 59 (2.6%)                                   | 0.436*         |
| Liver disease             | 63 (2.6%)                         | 2 (2.6%)                              | 61 (2.6%)                                   | 0.964*         |
| Cancer status             | 256 (10.7%)                       | 8 (10.3%)                             | 248 (10.8%)                                 | 0.887          |
| Immunosuppression         | 150 (6.3%)                        | 6 (7.7%)                              | 144 (6.3%)                                  | 0.606          |
| In hospital complications | Respiratory insufficiency         | 38 (48.7%)                            | 908 (39.4%)                                 | 0.098          |
|                           | Heart failure                     | 16 (20.5%)                            | 90 (3.9%)                                   | <0.001         |
|                           | Renal failure                     | 15 (19.2%)                            | 179 (7.8%)                                  | <0.001         |
|                           | Upper respiratory tract infection | 11 (14.1%)                            | 243 (10.5%)                                 | 0.317          |
|                           | Pneumonia                         | 60 (76.9%)                            | 1658 (73.8%)                                | 0.531          |
|                           | Sepsis                            | 26 (33.3%)                            | 133 (5.8%)                                  | <0.001         |

|                                         |                  |                  |                  |        |
|-----------------------------------------|------------------|------------------|------------------|--------|
| Systemic inflammatory response syndrome | 256 (10.7%)      | 7 (9%)           | 249 (10.8%)      | 0.607  |
| Relevant bleeding                       | 52 (2.2%)        | 6 (7.7%)         | 46 (2%)          | 0.001  |
| Hemoptysis                              | 35 (1.5%)        | 6 (7.7%)         | 29 (1.3%)        | <0.001 |
| Embolic events                          | 39 (1.6%)        | 3 (3.8%)         | 36 (1.6%)        | 0.180* |
| Hospital readmission for any cause      | 388 (16.3%)      | 37 (47.4%)       | 351 (15.2%)      | <0.001 |
| All-cause death                         | 126 (5.3%)       | 14 (17.9%)       | 112 (4.9%)       | <0.001 |
| Follow-up                               | 12.08;1.13-13.23 | 12.60;7.07-13.23 | 12.03;0.94-13.23 | -      |

**Supplementary Table S3** Long-term COVID-19 symptoms according to discharge troponin status after propensity score matching. Data has been calculated over the available population with the information, unless indicated otherwise with a fraction sign “/” using the available subjects for such parameter. P-values marked with an asterisk (\*) were corrected using the Fisher’s exact test.

|                                               | Population (n=2382)               | Elevated troponin on discharge (n=78) | Not elevated troponin on discharge (n=2304) | p value     |        |
|-----------------------------------------------|-----------------------------------|---------------------------------------|---------------------------------------------|-------------|--------|
| Any long-term COVID-19 symptoms               | 1307 (54.9%)                      | 59 (75.6%)                            | 1248 (54.2%)                                | <0.001      |        |
| Long-term COVID-19 Cardiovascular traits      | Fatigue                           | 692 (29.1%)                           | 45 (57.7%)                                  | 647 (28.1%) | <0.001 |
|                                               | Dyspnea                           | 585 (24.6%)                           | 49 (62.8%)                                  | 536 (23.2%) | <0.001 |
|                                               | Dizziness                         | 182 (7.6%)                            | 23 (29.5%)                                  | 159 (6.9%)  | <0.001 |
|                                               | Chest pain                        | 191 (8%)                              | 15 (19.2%)                                  | 176 (7.6%)  | <0.001 |
|                                               | Acute coronary syndrome           | 27 (1.1%)                             | 6 (7.7%)                                    | 21 (0.9%)   | <0.001 |
|                                               | Palpitations                      | 221 (9.3%)                            | 23 (29.5%)                                  | 198 (8.6%)  | <0.001 |
|                                               | Increased resting heart rate      | 119 (5%)                              | 14 (17.9%)                                  | 105 (4.6%)  | <0.001 |
|                                               | Syncope                           | 28 (1.2%)                             | 2 (2.6%)                                    | 26 (1.1%)   | 0.247* |
|                                               | Arrhythmia                        | 141 (5.9%)                            | 20 (25.6%)                                  | 121 (5.3%)  | <0.001 |
|                                               | Atrial fibrillation               | 104 (4.4%)                            | 10 (12.8%)                                  | 94 (4.1%)   | <0.001 |
|                                               | Peri/myocarditis                  | 12 (0.5%)                             | 5 (6.4%)                                    | 7 (0.3%)    | <0.001 |
|                                               | Inferior limb edema               | 84 (3.5%)                             | 12 (15.4%)                                  | 72 (3.1%)   | <0.001 |
|                                               | New onset hypertension            | 59 (2.5%)                             | 3 (3.8%)                                    | 56 (2.4%)   | 0.462* |
|                                               | New onset ventricular dysfunction | 43 (1.8%)                             | 15 (19.2%)                                  | 28 (1.2%)   | <0.001 |
|                                               | Relevant bleeding                 | 21 (0.9%)                             | 1 (1.3%)                                    | 20 (0.9%)   | 0.718* |
| Long-term COVID-19 neuro-psychological traits | Headache                          | 144 (6%)                              | 3 (3.8%)                                    | 141 (6.1%)  | 0.377* |
|                                               | Migraine                          | 64 (2.7%)                             | 1 (1.3%)                                    | 63 (2.7%)   | 0.387* |
|                                               | Ageusia                           | 119 (5%)                              | 5 (6.4%)                                    | 114 (4.9%)  | 0.560  |
|                                               | Anosmia                           | 102 (4.3%)                            | 7 (9%)                                      | 95 (4.1%)   | 0.037  |
|                                               | Attention disorder                | 114 (4.8%)                            | 9 (11.5%)                                   | 105 (4.6%)  | 0.005  |
|                                               | Memory loss                       | 156 (6.5%)                            | 10 (12.8%)                                  | 146 (6.3%)  | 0.023  |
|                                               | Cognitive impairment              | 93 (3.9%)                             | 8 (10.3%)                                   | 85 (3.7%)   | 0.003  |
|                                               | Anxiety                           | 274 (11.5%)                           | 17 (21.8%)                                  | 257 (11.2%) | 0.004  |
|                                               | Depression                        | 183 (7.7%)                            | 13 (16.7%)                                  | 170 (7.4%)  | 0.002  |
|                                               | Tinnitus or hearing loss          | 59 (2.5%)                             | 6 (7.7%)                                    | 53 (2.3%)   | 0.003  |
|                                               | Sleep disorder                    | 196 (8.2%)                            | 10 (12.8%)                                  | 186 (8.1%)  | 0.133  |

|                                   |                                  |            |            |             |        |
|-----------------------------------|----------------------------------|------------|------------|-------------|--------|
| Other long-term COVID-19 symptoms | Mood disorder                    | 143 (6%)   | 14 (17.9%) | 129 (5.6%)  | <0.001 |
|                                   | Paraonia                         | 44 (1.8%)  | 5 (6.4%)   | 39 (1.7%)   | 0.002  |
|                                   | Cough                            | 261 (11%)  | 21 (26.9%) | 240 (10.4%) | <0.001 |
|                                   | Reduced pulmonary diffusion test | 178 (7.5%) | 13 (16.7%) | 165 (7.2%)  | 0.002  |
|                                   | Polypnea                         | 69 (2.9%)  | 8 (10.3%)  | 61 (2.6%)   | <0.001 |
|                                   | Sleep apnea                      | 41 (1.7%)  | 5 (6.4%)   | 36 (1.6%)   | 0.001  |
|                                   | Digestive disorders              | 124 (5.2%) | 10 (12.8%) | 114 (4.9%)  | 0.002  |
|                                   | Nausea/Vomiting                  | 54 (2.3%)  | 5 (6.4%)   | 49 (2.1%)   | 0.012  |
|                                   | Intermittent fever               | 55 (2.3%)  | 8 (10.3%)  | 47 (2%)     | <0.001 |
|                                   | Chills                           | 46 (1.9%)  | 9 (11.5%)  | 37 (1.6%)   | <0.001 |
|                                   | Hair loss                        | 117 (4.9%) | 5 (6.4%)   | 112 (4.9%)  | 0.534  |
|                                   | Joint pain                       | 156 (6.5%) | 7 (9%)     | 149 (6.5%)  | 0.379  |
|                                   | Myalgias                         | 185 (7.8%) | 5 (6.4%)   | 180 (7.8%)  | 0.649  |
|                                   | Significant sweating episodes    | 27 (1.1%)  | 1 (1.3%)   | 26 (1.1%)   | 0.902* |
|                                   | Significant weight loss          | 130 (5.5%) | 3 (3.8%)   | 127 (5.5%)  | 0.503* |
|                                   | Cutaneous involvement            | 67 (2.8%)  | 3 (3.8%)   | 64 (2.8%)   | 0.594* |
|                                   | New onset diabetes mellitus      | 31 (1.3%)  | 2 (2.6%)   | 29 (1.3%)   | 0.375* |
|                                   | New onset renal failure          | 67 (2.8%)  | 13 (16.7%) | 54 (2.3%)   | <0.001 |
|                                   | Red eye symptoms                 | 29 (1.2%)  | 0 (0%)     | 29 (1.3%)   | 0.163* |
|                                   | Flushing                         | 10 (0.4%)  | 0 (0%)     | 10 (0.4%)   | 0.414* |
|                                   | Incident neoplasia               | 23 (1%)    | 3 (3.8%)   | 20 (0.9%)   | 0.043* |

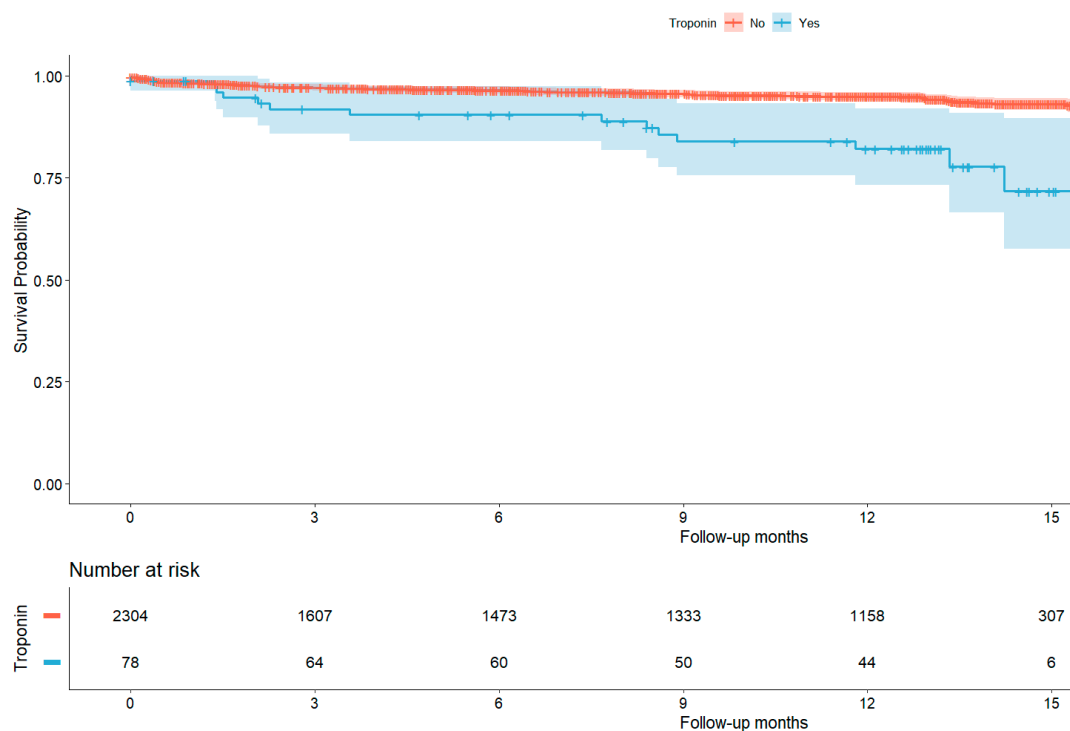

**Supplementary Figure S1.** Survival analysis represented by Kaplan-Meier curves (upper part) and number of patients at risk after the end of each time period (lower part). The shaded area surrounding each curve represents the 95% confidence interval; demonstrating greater all-cause mortality with a Log-Rank (Mantel-Cox) test of 27.70 ( $p < 0.001$ ) in patients with elevated troponin after hospital discharge in the overall population.
